# Supplementary material
Source: PubMed Central journal article supplement (PMC3685250)
Supplement: AEM.00178-13_zam999104361so1.pdf [file AEM.00178-13_zam999104361so1.pdf]

TABLE S1. Primers used in this study

| Primer  | Gene                                                                 | Sequence (5' - 3') <sup>a</sup>                       |
|---------|----------------------------------------------------------------------|-------------------------------------------------------|
| Cloning |                                                                      |                                                       |
| RG037   | LCABL_08550                                                          | AGTCAAGCTTGTTCAGATTATTCGCGCACC                        |
| RG038   | LCABL_08550                                                          | GACTACTAGTCTGACACTTGATTGCCTTGC                        |
| RG039   | LCABL_24490                                                          | AGTCAAGCTTTTCCGCTATCGTCTGTCTTG                        |
| RG040   | LCABL_24490                                                          | GACTACTAGTTGAAGGTCGTCTAGCAAAGC                        |
| RG047   | LCABL_16400                                                          | <b>CTATAGGGCGAATTG</b> GGTACCGCAAGCCTTCAGTAT<br>CGCCG |
| RG048   | LCABL_16400                                                          | <b>CTCGAGGGGGGGCCCG</b> GTACCTCAGCCGCGTTTTGA<br>TAGCG |
| RG049   | LCABL_19580                                                          | <b>CTATAGGGCGAATTG</b> GGTACCGCATTGCTGGCGTCG<br>TTTTG |
| RG050   | LCABL_19580                                                          | <b>CTCGAGGGGGGGCCCG</b> GTACCGCCGGTCGGGAAAAG<br>ATTGG |
| RG058   | LCABL_16440                                                          | TTTTCTCGAGTAAAATATAACCAGCCAACAGCGG                    |
| RG059   | LCABL_16440/<br>LCABL_16430<br>intergenic region and<br>LCABL_16420  | CGAGCGGCAATAAGCTTTCATCATCTCGTATACATC<br>CCCTTGGGTATC  |
| RG060   | LCABL_16420 and<br>intergenic region<br>LCABL_16440 /<br>LCABL_16430 | GATACCCAAGGGGATGTATACGAGATGATGAAAGCT<br>TATTGCCGCTCG  |
| RG061   | LCABL_16420                                                          | AAAAGAATTCTGTCACTAATAACAGTTGGCAATGG                   |

## Cloning checking

|           |                |                             |
|-----------|----------------|-----------------------------|
| pRV300.fw | pRV300 plasmid | GTTTTCCAGTCACGAC            |
| pRV300.rv | pRV300 plasmid | CAGGAAACAGCTATGAC           |
| RG003     | LCABL_19580    | GTCCGATCACTGACAAGC          |
| RG066     | LCABL_16420    | GCAATTGTTCAAAAATAAAATGCAGCC |
| RG067     | LCABL_16440    | GATGGCCAACGCGGCAGATAAG      |
| RG074     | LCABL_16440    | CATATTGCAACCCGGCGAGA        |
| RG075     | LCABL_16420    | CACCGCGTTTGGGGAAAATG        |
| LSEI1418R | LCABL_16410    | GTCAACATTACTTAAATTAAAAA     |

## qRT-PCR

|        |             |                       |
|--------|-------------|-----------------------|
| lepA-F | lepA        | CACATTGATCACGGGAAGTC  |
| lepA-R | lepA        | GTAATGCCACGTTACGTTTC  |
| ileS-F | ileS        | ACCATTCCGGCTAACTATGG  |
| ileS-R | ileS        | TCAGGATCTTCGGATTTTCC  |
| pcrA-F | pcrA        | CGGCCAATAATGTGATTCAG  |
| pcrA-R | pcrA        | TCATCAGTTTCGCTTTGAGC  |
| pyrG-F | pyrG        | AATTGCGCTTTTCACTGATG  |
| pyrG-R | pyrG        | CGAAATGATCGACCACAATC  |
| RG006  | LCABL_19580 | GGGAACGCGCATTTCATTGTG |
| RG007  | LCABL_19580 | TCTCGCGCTGAACAAGATCC  |
| RG008  | LCABL_21670 | TTGCCGGTATTTTGGTCGGG  |
| RG009  | LCABL_21670 | ATGTCCACAATACGGCTGGC  |
| RG019  | LCABL_08550 | TGGTCGAGGTTTTCTTGGGC  |

|       |             |                        |
|-------|-------------|------------------------|
| RG020 | LCABL_08550 | CCGGTGTATGGGCAACATCC   |
| RG021 | LCABL_24490 | GCCGGATCAGCCAAGACTTG   |
| RG022 | LCABL_24490 | TTAGCATCGGTGTAACGGCG   |
| RG027 | LCABL_19590 | TAGCTTTCAGGTCAACGCGG   |
| RG028 | LCABL_19590 | CTTGGCGTCTCAATCGTTGC   |
| RG029 | LCABL_19600 | GGCAATGAATATGGGCGCTG   |
| RG030 | LCABL_19600 | TAGGTTCGTCTGAAGCAAGGC  |
| RG031 | LCABL_21680 | CACCCGCATTGAAAGGTGTC   |
| RG032 | LCABL_21680 | GCAAGGTCGTTTTCCCTGAAC  |
| RG033 | LCABL_16410 | GGACAGGATCTGAGCAACGTC  |
| RG034 | LCABL_16410 | ATTGAAGGTGTCAAGCAAGTCG |
| RG054 | LCABL_16400 | GTACCGTCCTTTCCCGCATC   |
| RG055 | LCABL_16400 | CCGATGGTAATGATCCCGGC   |
| RG056 | LCABL_16430 | AGCGAGTTACGCAAACACAG   |
| RG057 | LCABL_16430 | CGGCTCCTAAGTTCATCGCC   |

---

<sup>a</sup> Restriction sites are underlined. Sequences highlighted in boldface type are the sequences for the CloneEZ PCR reaction. See materials and methods for details.

TABLE S2. BceRS-BceAB like resistance modules identified in *L. casei* BL23

|                   | Descriptive name in this article                 | Loci              | Phylogenetic group <sup>a</sup> | Induced by nisin? | Resistance substrates <sup>b</sup> | ABC regulated by TCS? | ABC required for sensing? |
|-------------------|--------------------------------------------------|-------------------|---------------------------------|-------------------|------------------------------------|-----------------------|---------------------------|
| Resistance module | TCS09: <i>hk09-rr09</i>                          | LCABL_16420-16430 | II                              | No                | Bac, Nis, Plec, Sub                | Yes (TCS09)           | Yes                       |
|                   | ABC09: <i>permease09-ATPase09</i>                | LCABL_16400-16410 | II                              | Yes               |                                    |                       |                           |
|                   | TCS12: <i>rr12-hk12</i>                          | LCABL_19600-19610 | V                               | No                | Bac, Nis, Mer, Plec, Sub, Van      | No                    | Yes                       |
|                   | ABC12: <i>permease12-ATPase12</i>                | LCABL_19580-19590 | No group assigned               | No                |                                    |                       |                           |
|                   | Orphan ABC: <i>orphan permease-orphan ATPase</i> | LCABL_21670-21680 | VI                              | Yes               | n.d.                               | Yes (TCS12)           | n.d.                      |

<sup>a</sup>Phylogenetic group assigned according to Dintner *et al.* 2011 (1) classification of Pep7E-type permeases and BceS-like HKs.

<sup>b</sup> Bac, bacitracin; Nis, nisin; Mer, mersacidin; Plec, plectasin; Sub, subtilin; Van, vancomycin.

n.d. not determined

1. **Dintner S, Staroń A, Berchtold E, Petri T, Mascher T, Gebhard S.** 2011. Coevolution of ABC transporters and two-component regulatory systems as resistance modules against antimicrobial peptides in *Firmicutes* Bacteria. *J. Bacteriol.* **193**:3851-3862.
